# Supplementary material
Source: PubMed Central journal article supplement (PMC4179868)

**A**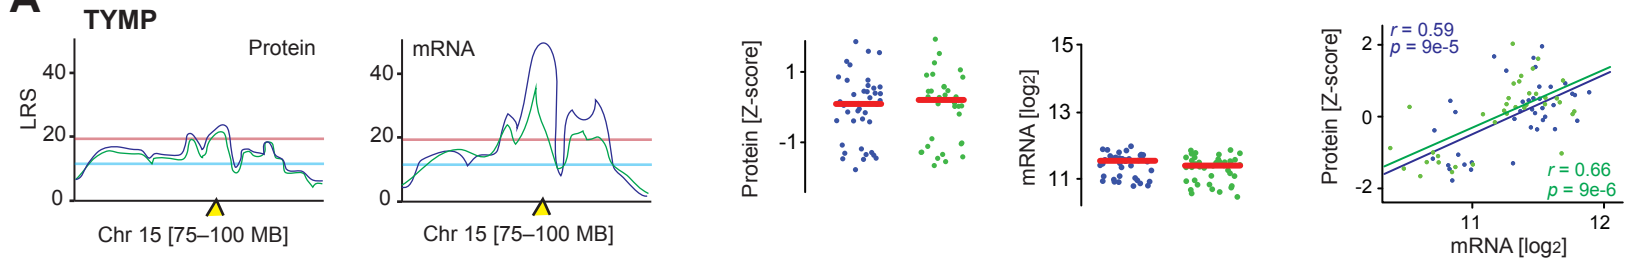**B**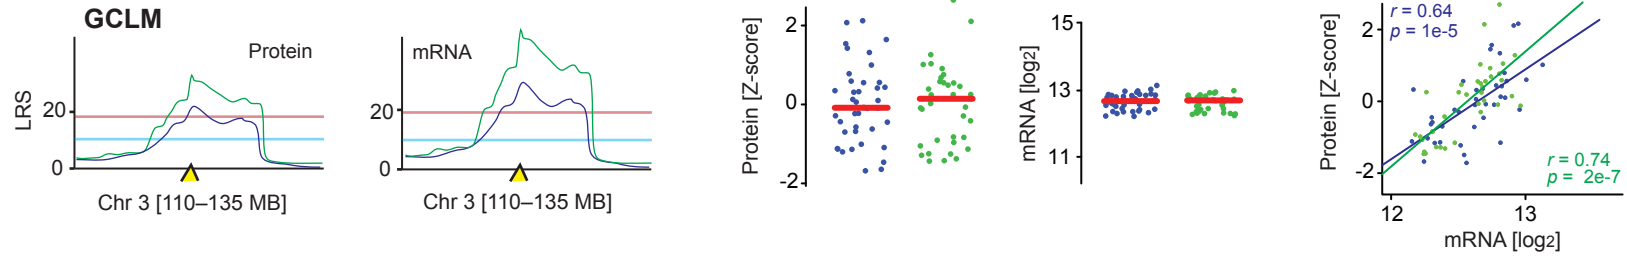

Supplement: NIHMS628079-supplement-Figure_S1.pdf [file NIHMS628079-supplement-Figure_S1.pdf]

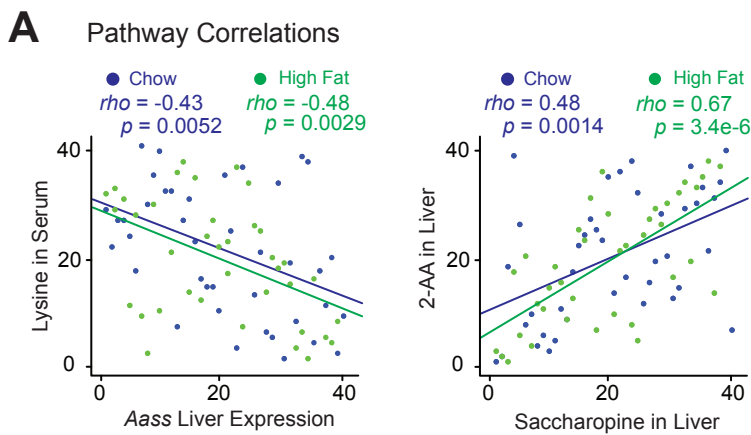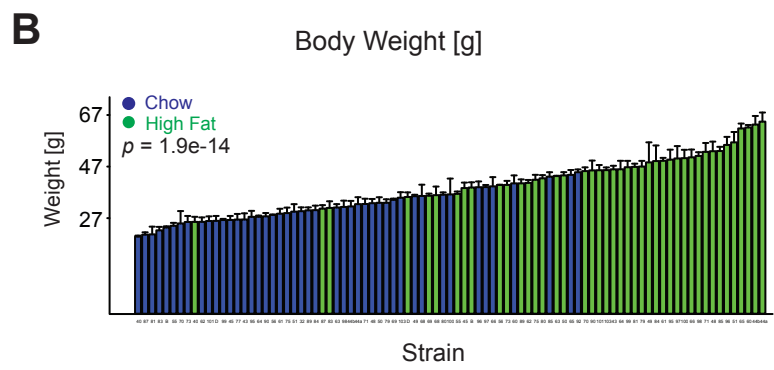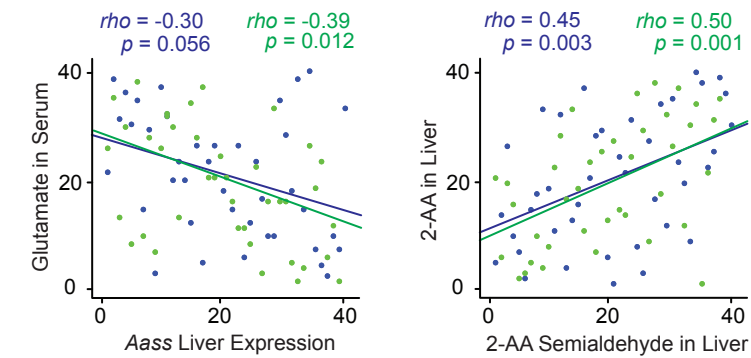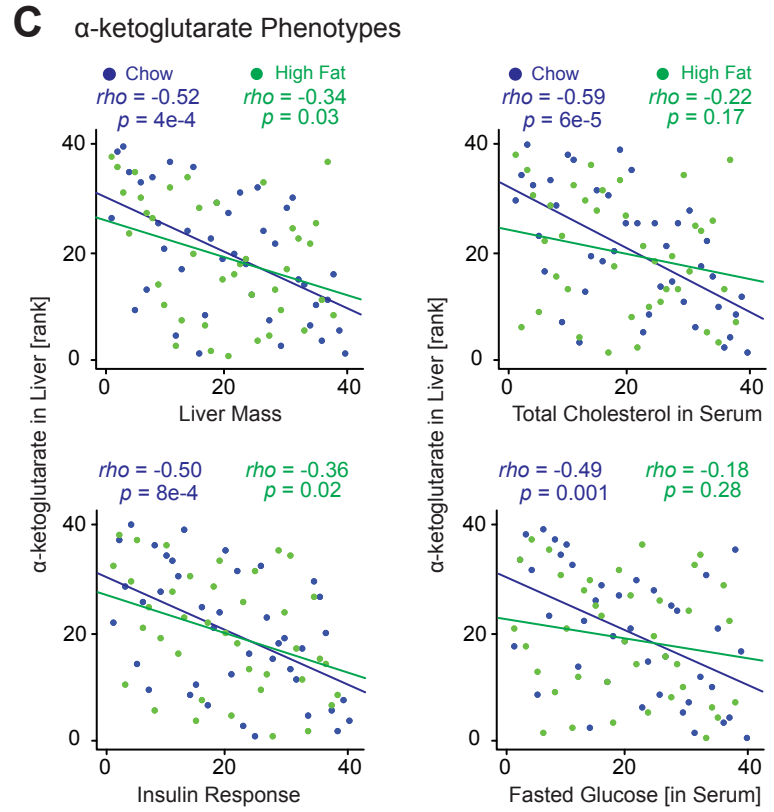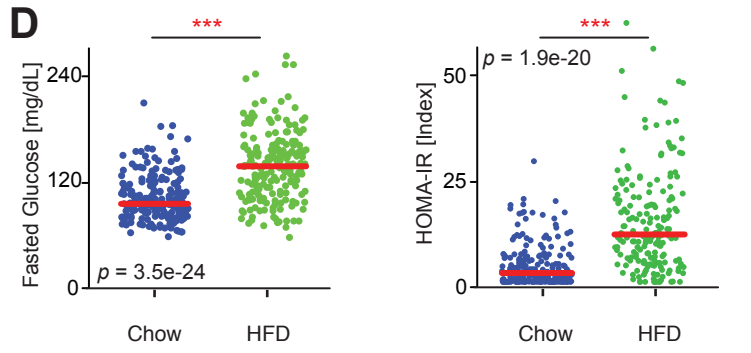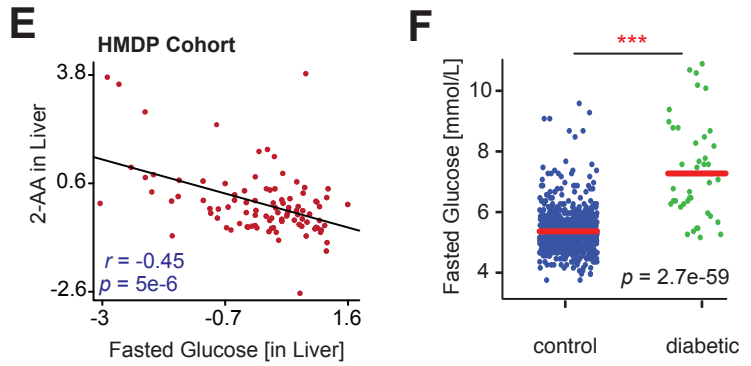

Supplement: NIHMS628079-supplement-Figure_S2.pdf [file NIHMS628079-supplement-Figure_S2.pdf]
